# Supplementary material for: Penicilazaphilones D and E: two new azaphilones from a sponge-derived strain of the fungus Penicillium sclerotiorum
Source: Royal Society of Chemistry journal article supplement (doi:10.1039/c7ra13327h), 2018-01-01
Supplement: c7ra13327h1.pdf [file c7ra13327h1.pdf]

## *Supporting Information*

# **Penicilazaphilones D and E: Two New Azaphilones from a Sponge-Derived Strain of the Fungus *Penicillium sclerotiorum***

Chao-Yi Wang,<sup>a,b</sup> Jun-Di Hao,<sup>a,b</sup> Xing-Yan Ning,<sup>a,b</sup> Jing-Shuai Wu,<sup>a,b</sup> Dong-Lin  
Zhao,<sup>a,b</sup> Chui-Jian Kong,<sup>a,b</sup> Chang-Lun Shao,<sup>\*a,b</sup> and Chang-Yun Wang<sup>\*a,b,c</sup>

### Affiliation

<sup>a</sup> Key Laboratory of Marine Drugs, The Ministry of Education of China, School of  
Medicine and Pharmacy, Ocean University of China, Qingdao 266003, People's  
Republic of China

<sup>b</sup> Laboratory for Marine Drugs and Bioproducts, Qingdao National Laboratory for  
Marine Science and Technology, Qingdao 266071, People's Republic of China

<sup>c</sup> Institute of Evolution & Marine Biodiversity, Ocean University of China, Qingdao  
266003, People's Republic of China

### Correspondence

\* To whom correspondence should be addressed.

Tel/Fax: +86-531-82031536 (C.-Y. Wang); 86-532-82031381 (C.-L. Shao). E-mail:  
changyun@ouc.edu.cn (C.-Y. Wang); shaochenglun@ouc.edu.cn (C.-L. Shao).

## List of Supporting Information

- Figure S1.**  $^1\text{H}$  NMR (500 MHz, acetone- $d_6$ ) spectrum of compound **1**
- Figure S2.** Partial  $^1\text{H}$  NMR (500 MHz, acetone- $d_6$ ) spectrum of compound **1**
- Figure S3.**  $^{13}\text{C}$  NMR (125 MHz, acetone- $d_6$ ) spectrum of compound **1**
- Figure S4.** HMQC (acetone- $d_6$ ) spectrum of compound **1**
- Figure S5.**  $^1\text{H}$ - $^1\text{H}$  COSY (acetone- $d_6$ ) spectrum of compound **1**
- Figure S6.** HMBC (acetone- $d_6$ ) spectrum of compound **1**
- Figure S7.** NOESY (acetone- $d_6$ ) spectrum of compound **1**
- Figure S8.** ESIMS spectrum of compound **1**
- Figure S9.** HRESIMS spectrum of compound **1**
- Figure S10.**  $^1\text{H}$  NMR (500 MHz, acetone- $d_6$ ) spectrum of compound **2**
- Figure S11.** Partial  $^1\text{H}$  NMR (500 MHz, acetone- $d_6$ ) spectrum of compound **2**
- Figure S12.**  $^1\text{H}$  NMR (500 MHz,  $\text{CDCl}_3$ ) spectrum of compound **2**
- Figure S13.** Partial  $^1\text{H}$  NMR (500 MHz,  $\text{CDCl}_3$ ) spectrum of compound **2**
- Figure S14.**  $^{13}\text{C}$  NMR (125 MHz, acetone- $d_6$ ) spectrum of compound **2**
- Figure S15.** HMQC (acetone- $d_6$ ) spectrum of compound **2**
- Figure S16.**  $^1\text{H}$ - $^1\text{H}$  COSY (acetone- $d_6$ ) spectrum of compound **2**
- Figure S17.** HMBC (acetone- $d_6$ ) spectrum of compound **2**
- Figure S18.** Partial HMBC (acetone- $d_6$ ) spectrum of compound **2**
- Figure S19.** NOESY (acetone- $d_6$ ) spectrum of compound **2**
- Figure S20.** Partial NOESY (acetone- $d_6$ ) spectrum of compound **2**
- Figure S21.** ESIMS spectrum of compound **2**
- Figure S22.** HRESIMS spectrum of compound **2**
- Table S1.**  $^1\text{H}$  NMR Data (500 MHz,  $\delta$  in ppm,  $J$  in Hz) and  $^{13}\text{C}$  NMR Data (125 MHz,  $\delta$  in ppm) for **5**
- Table S2.** Antibacterial activities of **3** against bacterial strains
- ECD calculation details of compound 1**

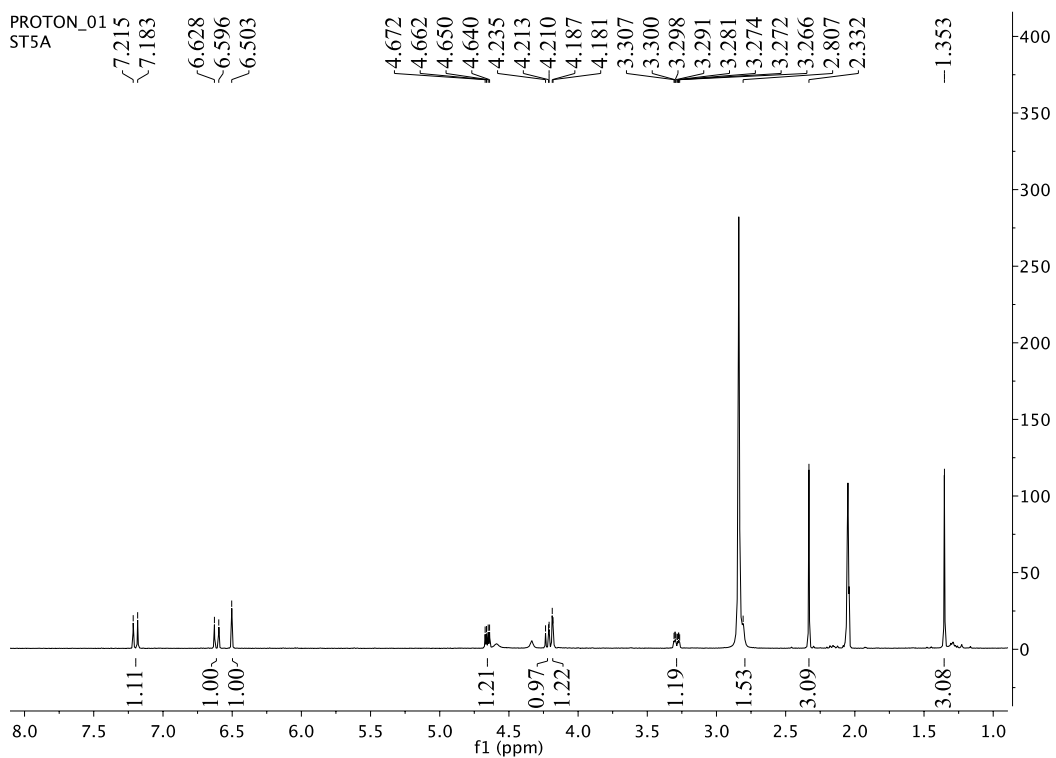

**Figure S1.**  $^1\text{H}$  NMR (500 MHz, acetone- $d_6$ ) spectrum of compound **1**

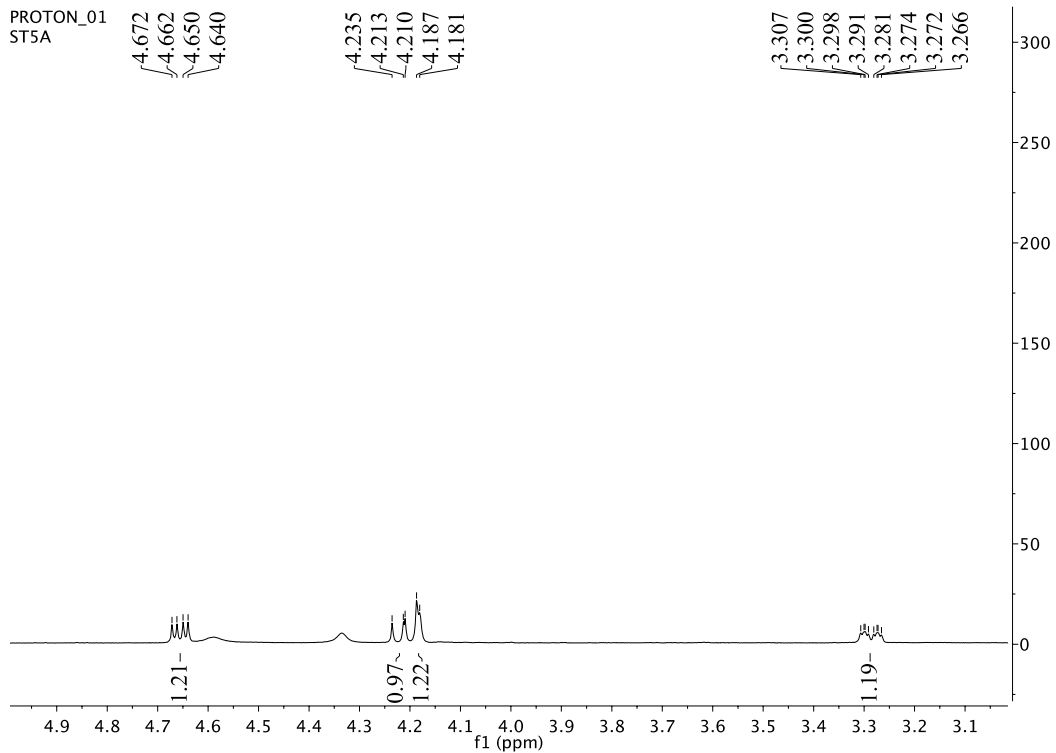

**Figure S2.** Partial  $^1\text{H}$  NMR (500 MHz, acetone- $d_6$ ) spectrum of compound **1**

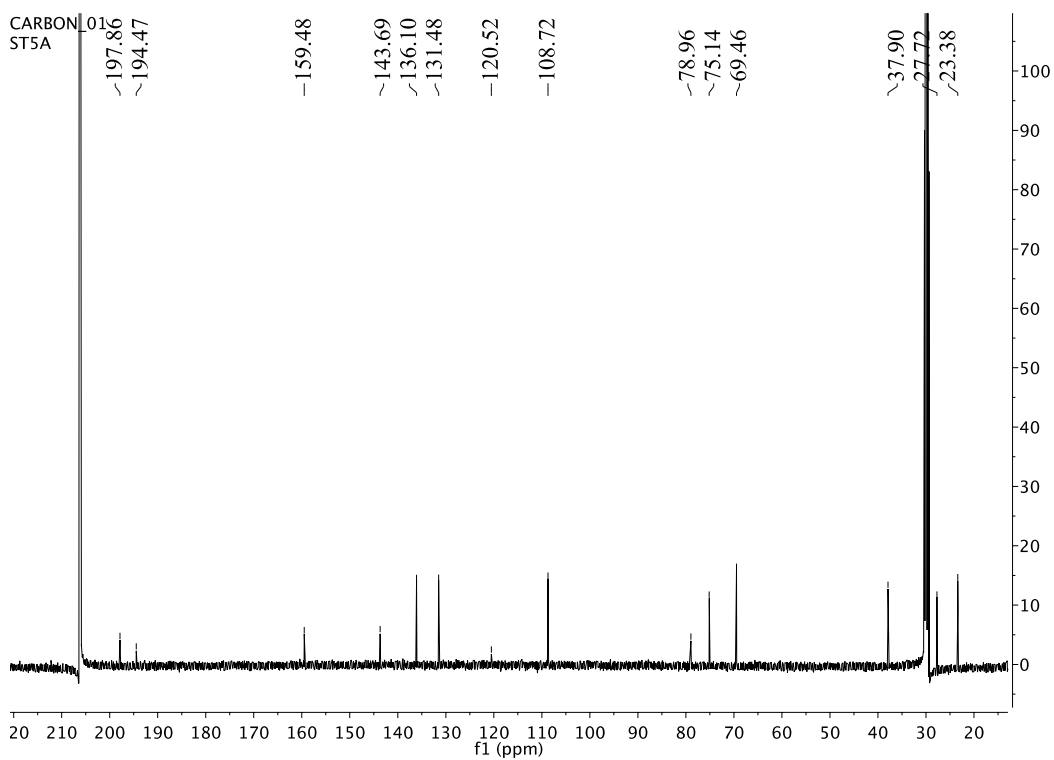

**Figure S3.**  $^{13}\text{C}$  NMR (125 MHz, acetone- $d_6$ ) spectrum of compound **1**

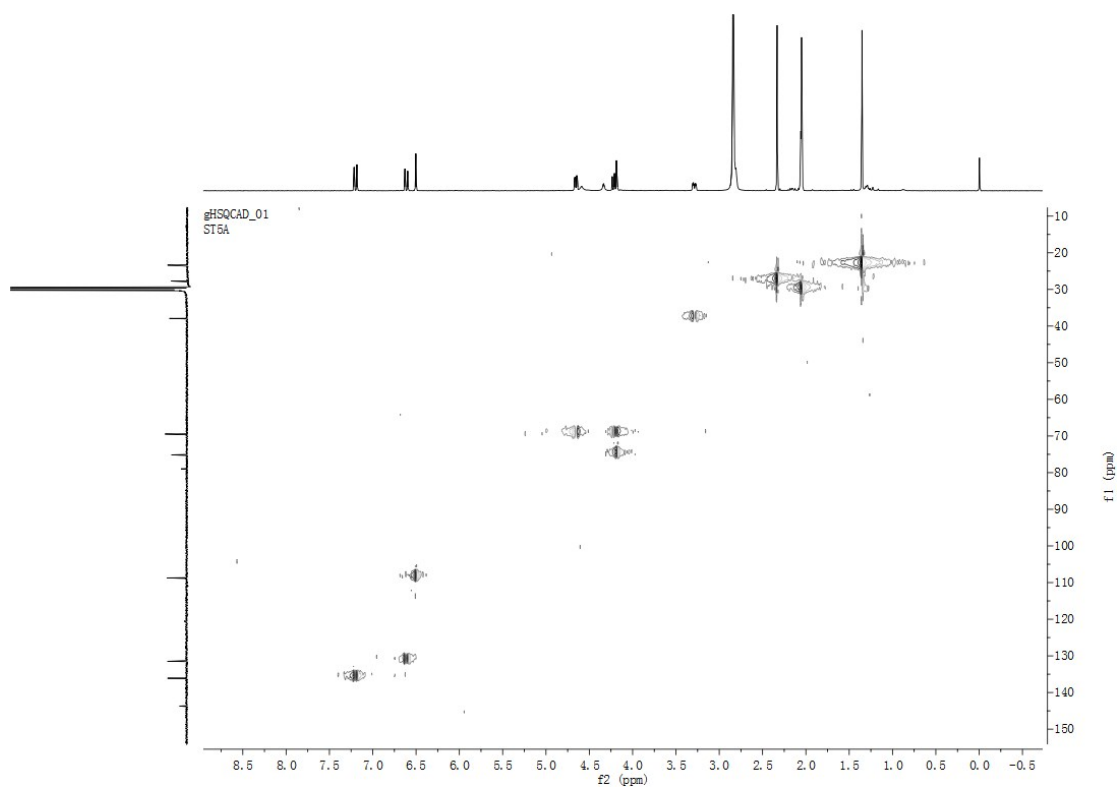

**Figure S4.** HMQC (acetone- $d_6$ ) spectrum of compound **1**

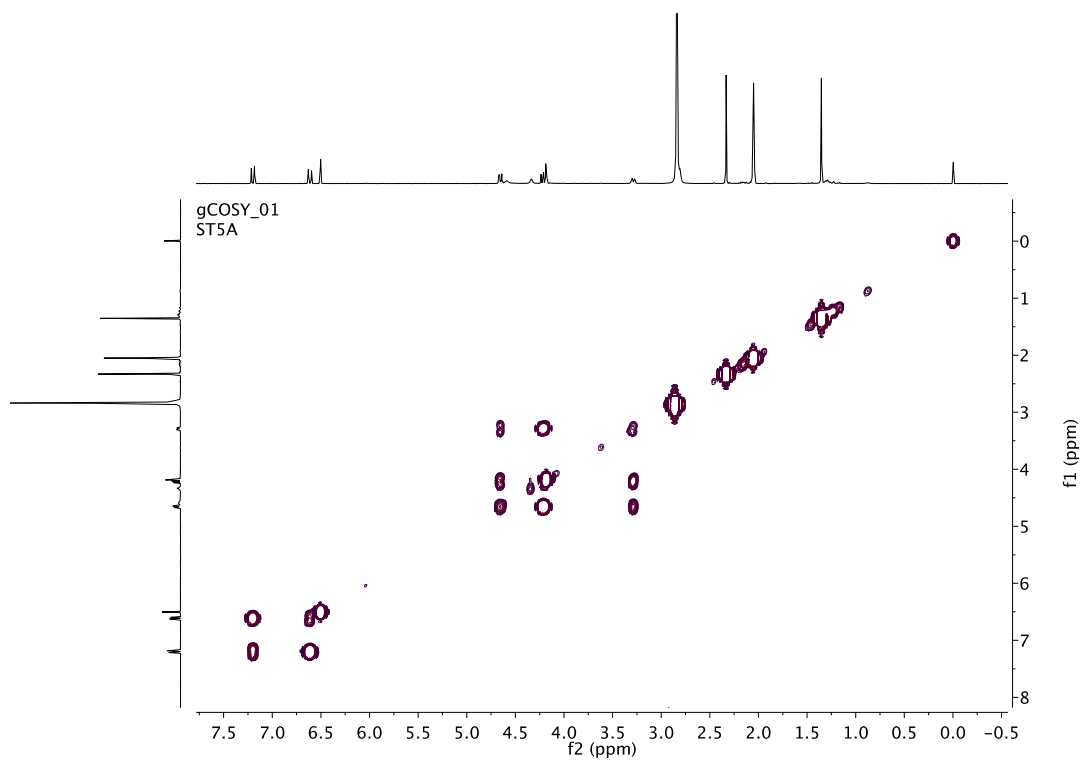

**Figure S5.**  $^1\text{H}$ - $^1\text{H}$  COSY (acetone- $d_6$ ) spectrum of compound **1**

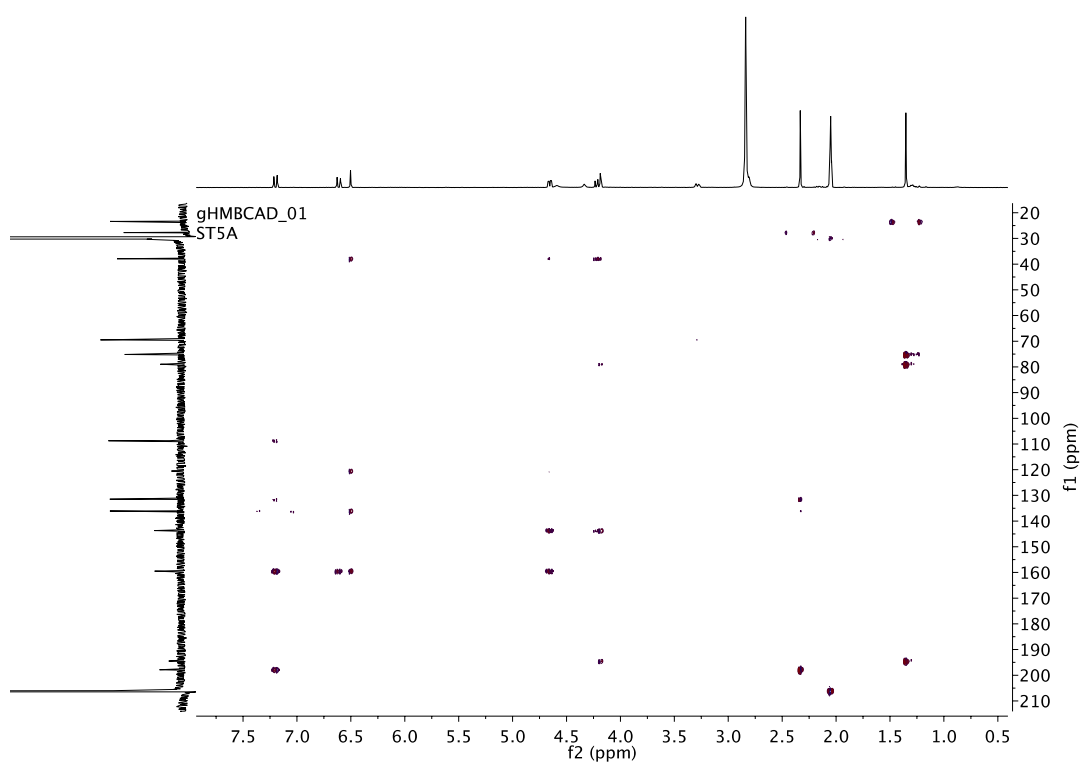

**Figure S6.** HMBC (acetone- $d_6$ ) spectrum of compound **1**

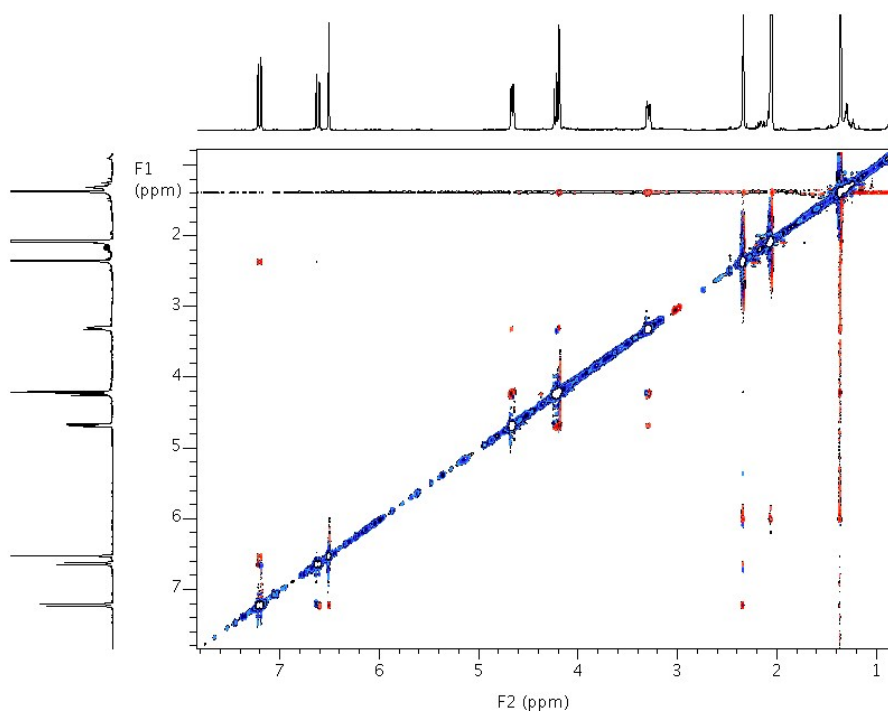

**Figure S7.** NOESY (acetone-*d*<sub>6</sub>) spectrum of compound **1**

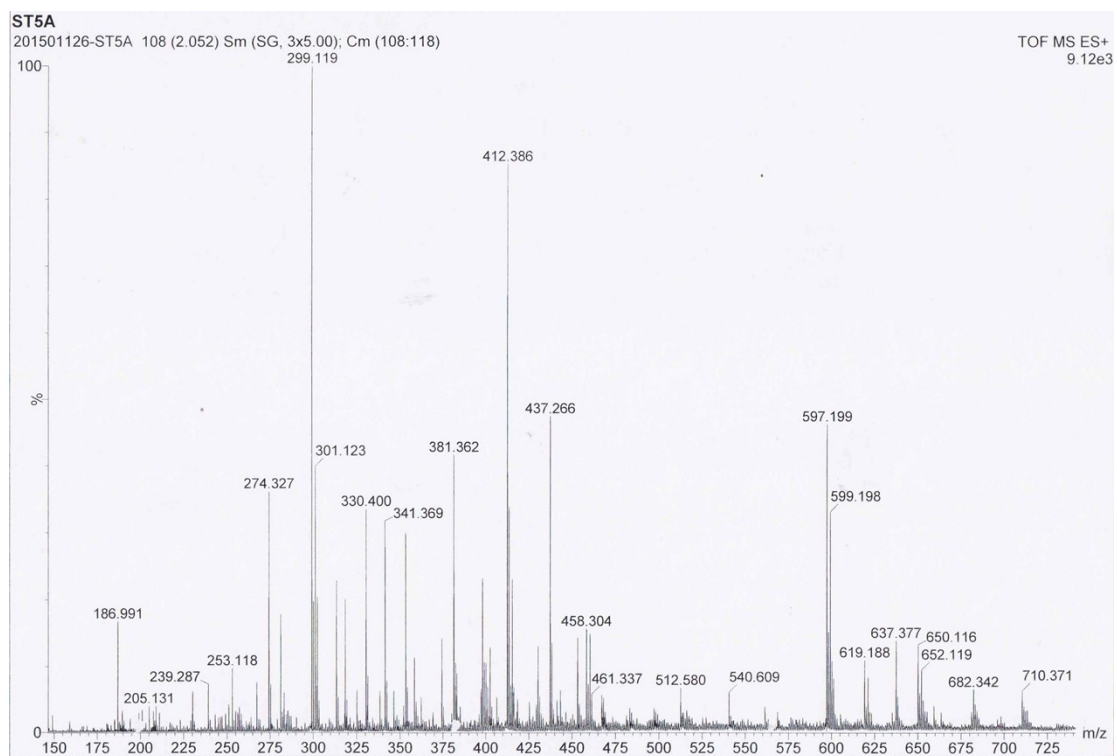

**Figure S8.** ESIMS spectrum of compound **1**

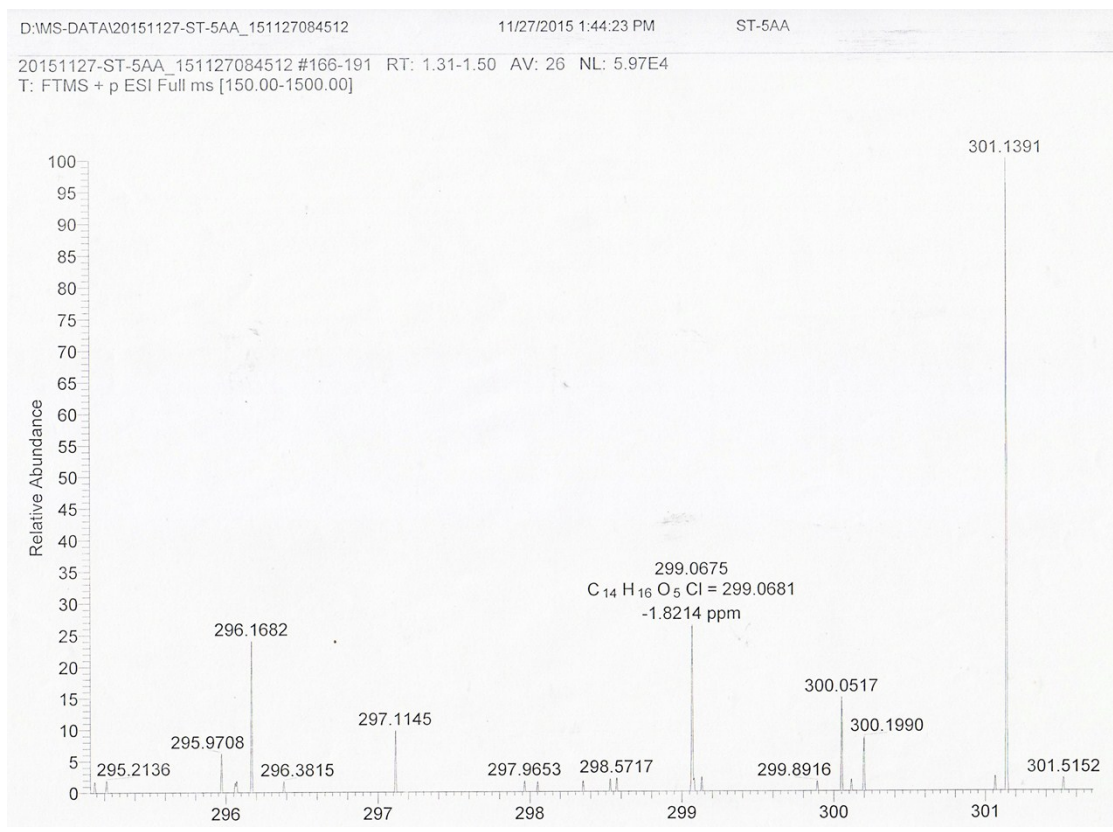

**Figure S9.** HRESIMS spectrum of compound **1**

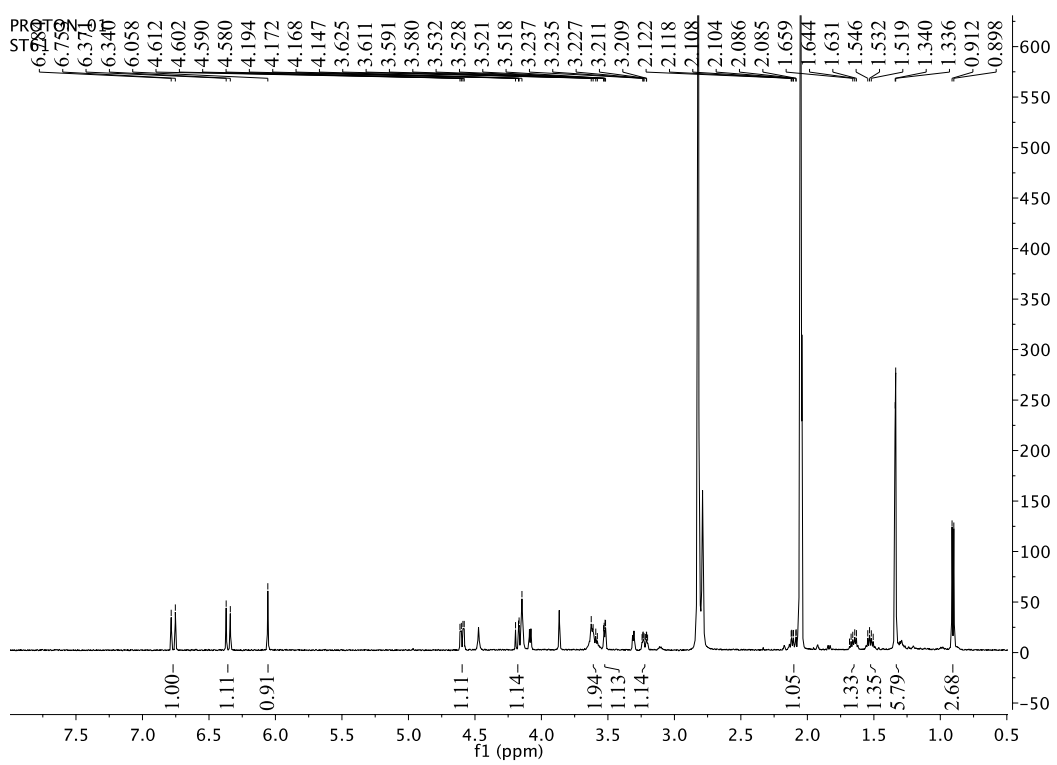

**Figure S10.**  $^1H$  NMR (500 MHz, acetone- $d_6$ ) spectrum of compound **2**

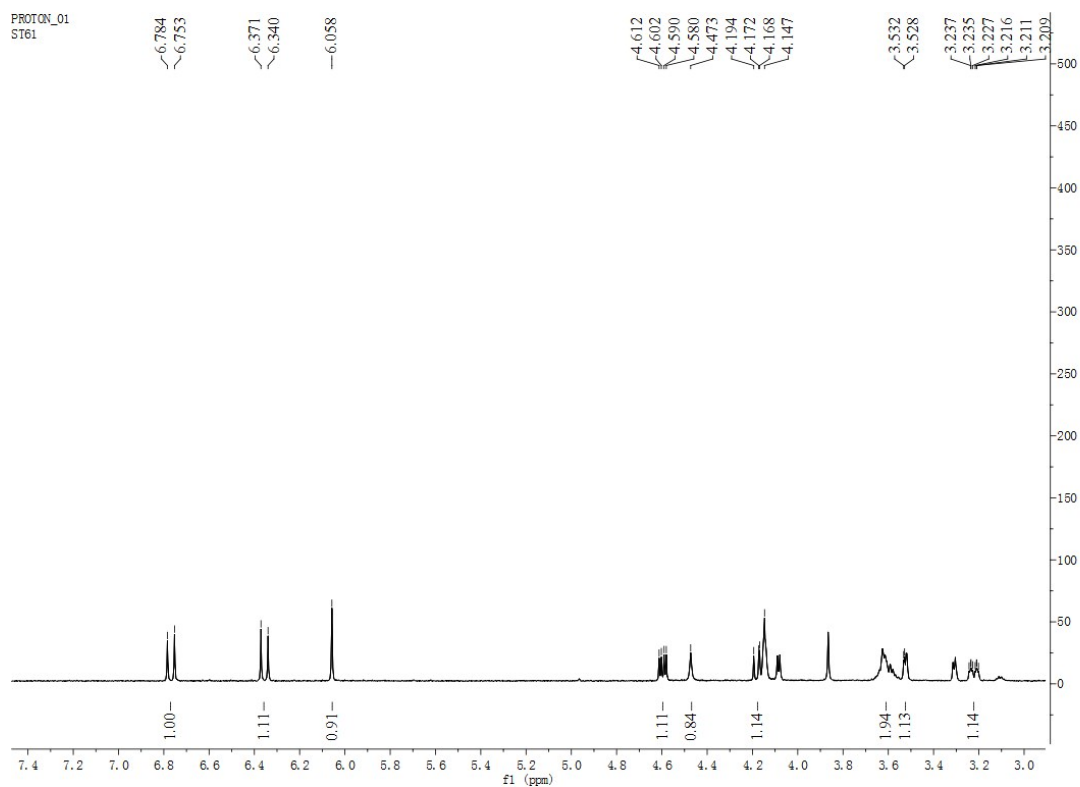

**Figure S11.** Partial  $^1\text{H}$  NMR (500 MHz, acetone- $d_6$ ) spectrum of compound **2**

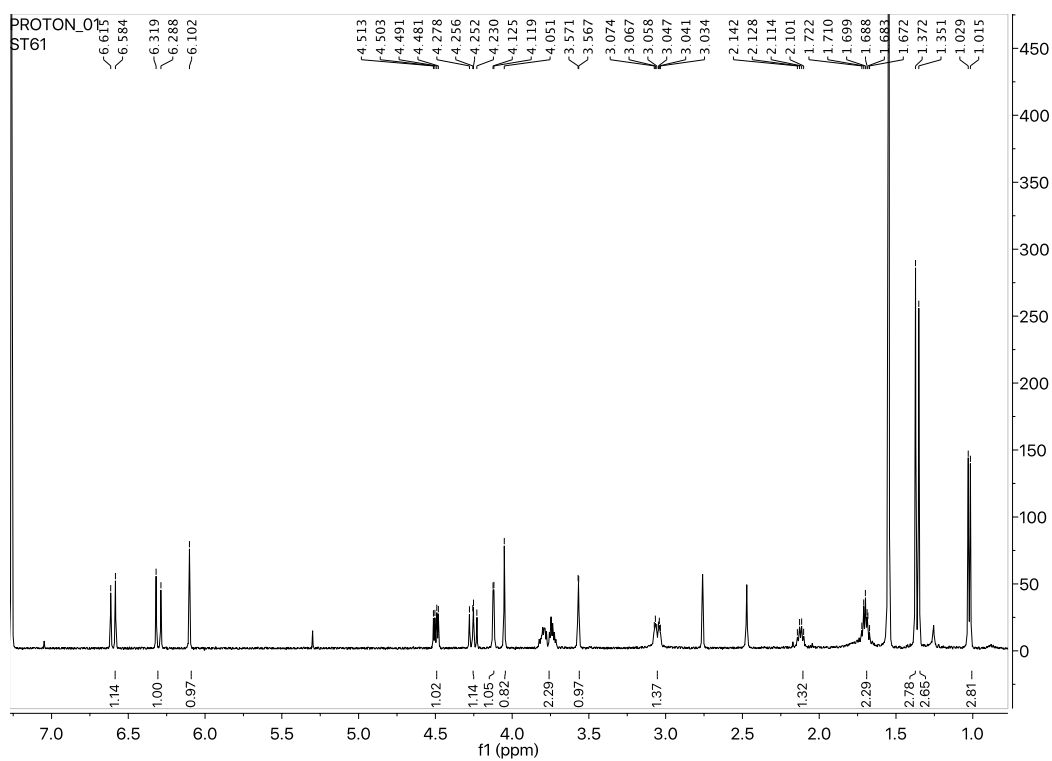

**Figure S12.**  $^1\text{H}$  NMR (500 MHz,  $\text{CDCl}_3$ ) spectrum of compound **2**



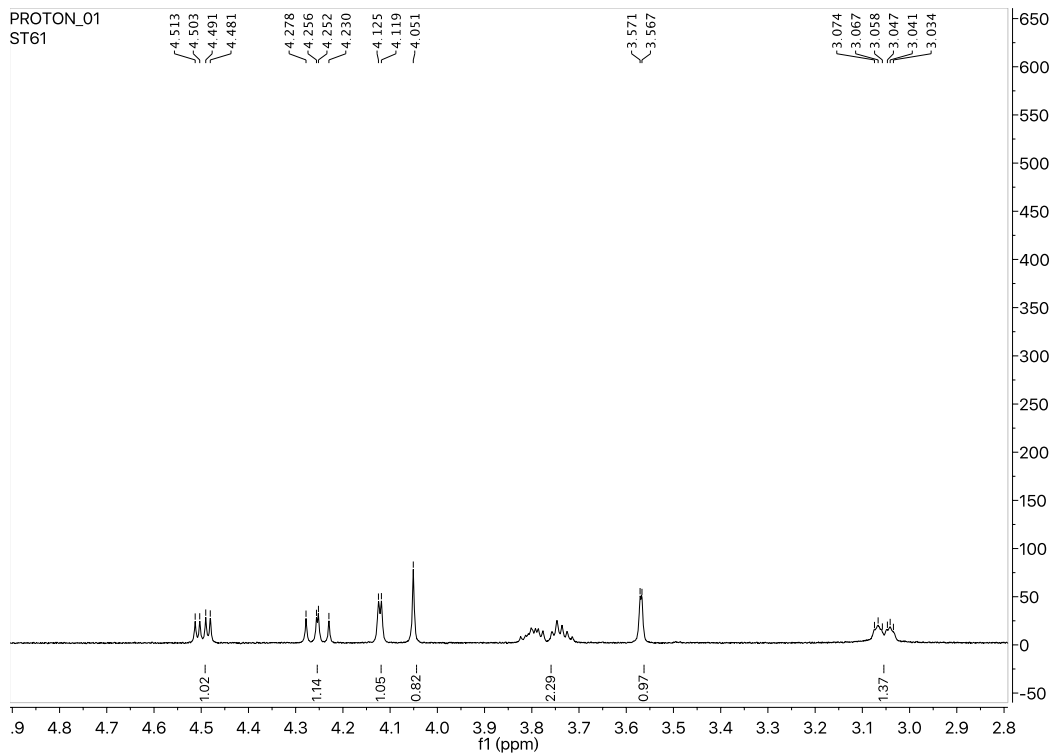

**Figure S13.** Partial  $^1\text{H}$  NMR (500 MHz,  $\text{CDCl}_3$ ) spectrum of compound **2**

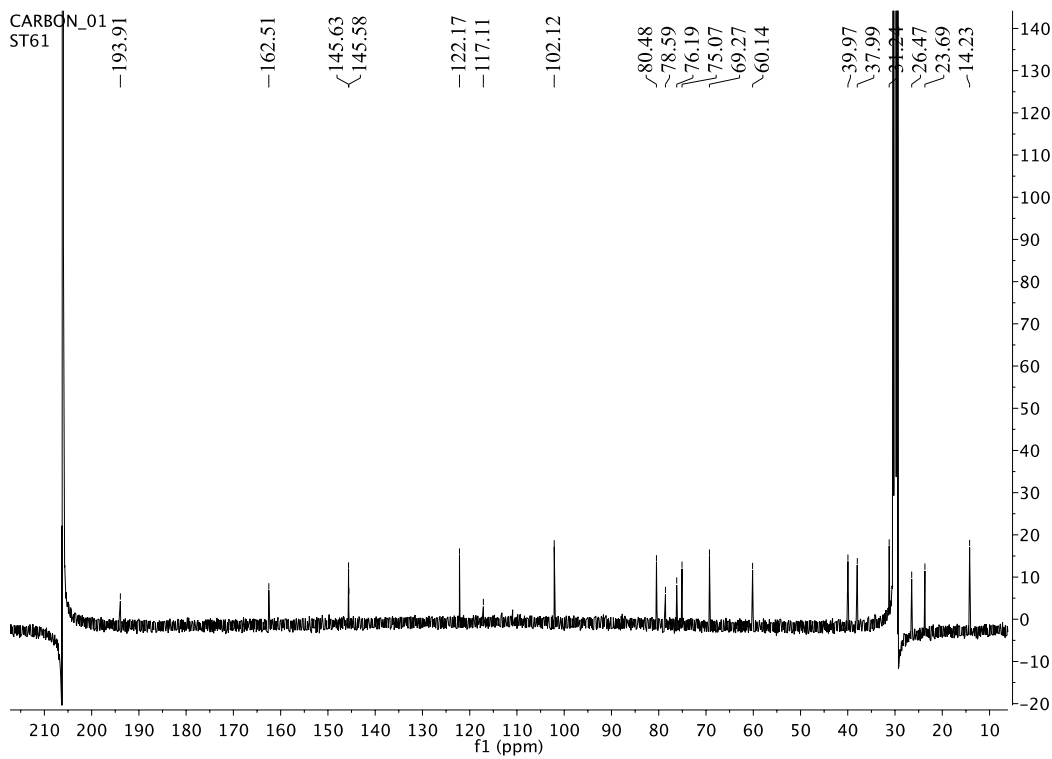

**Figure S14.**  $^{13}\text{C}$  NMR (125 MHz, acetone- $d_6$ ) spectrum of compound **2**

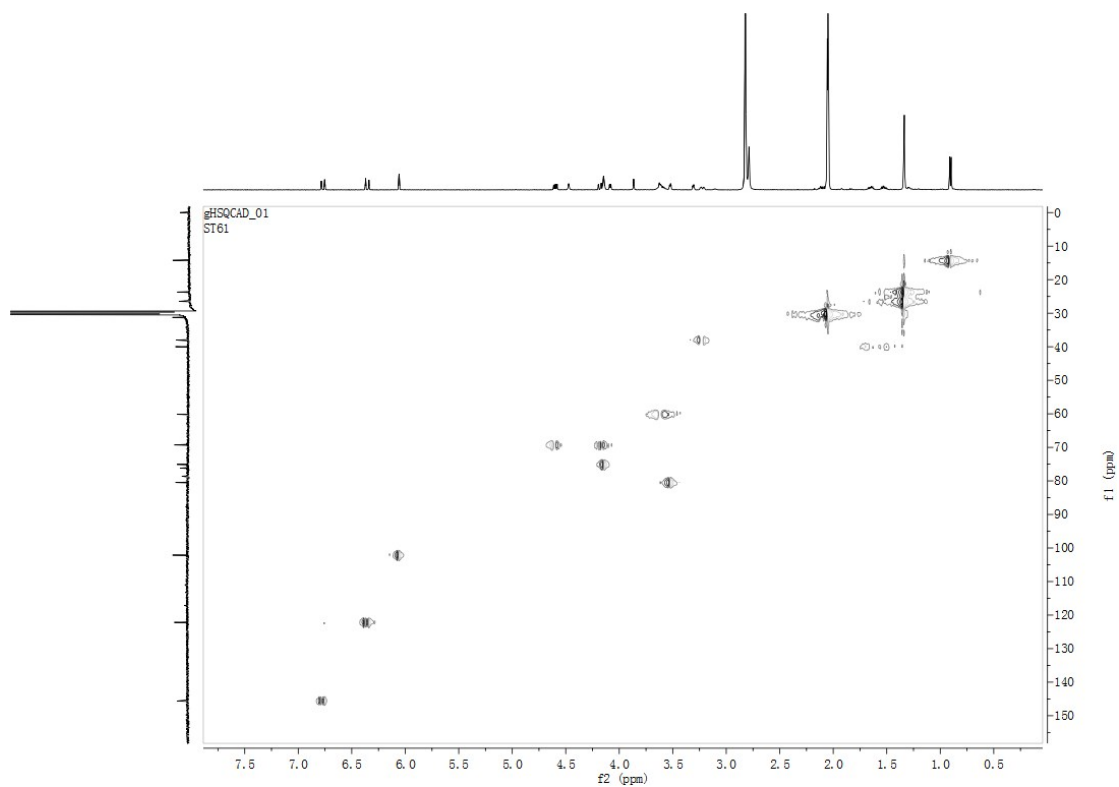

**Figure S15.** HMQC (acetone- $d_6$ ) spectrum of compound **2**

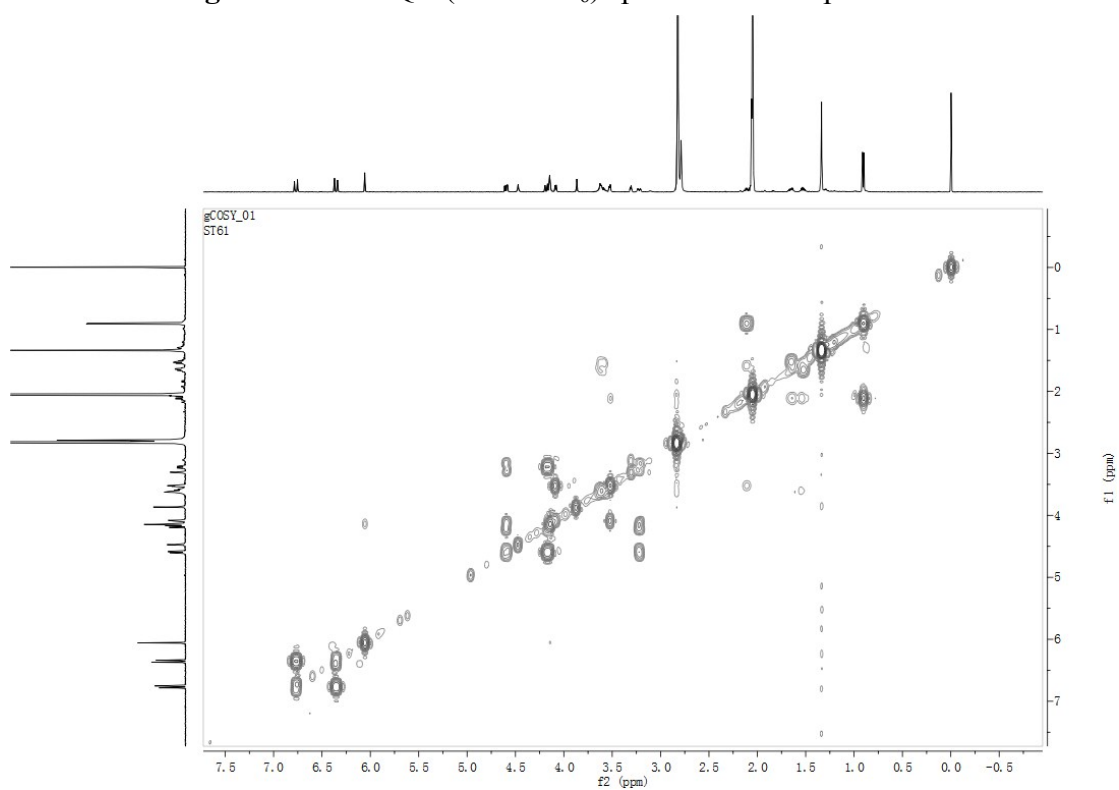

**Figure S16.**  $^1\text{H}$ - $^1\text{H}$  COSY (acetone- $d_6$ ) spectrum of compound **2**

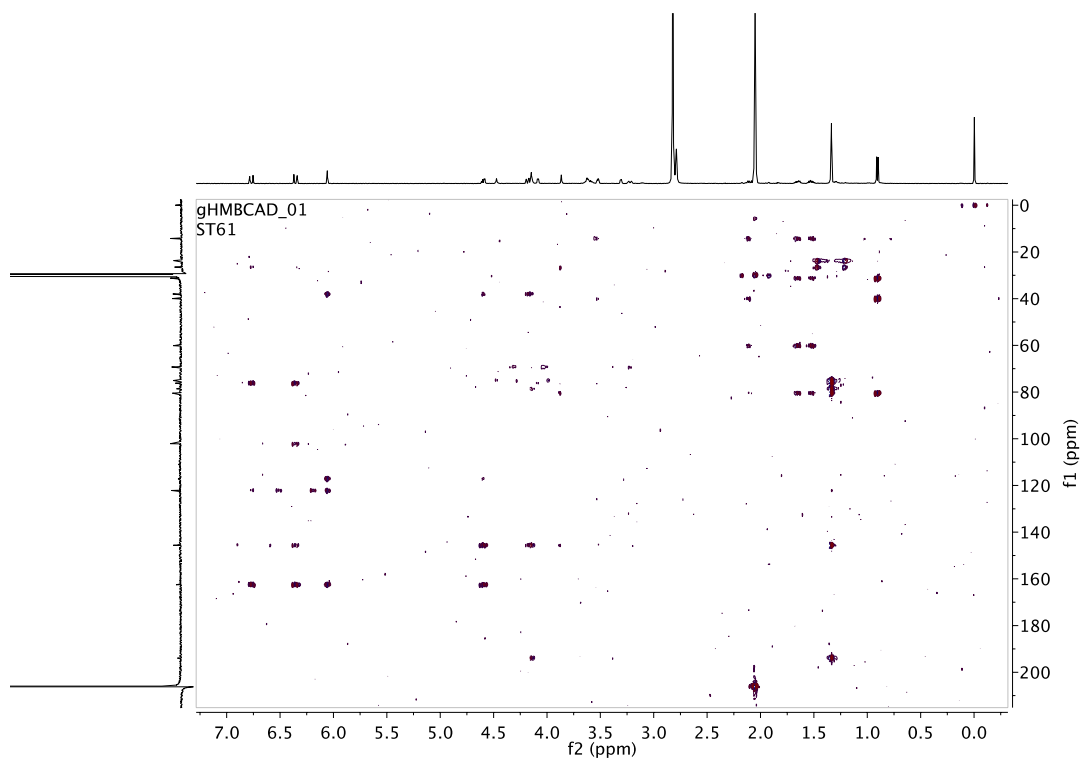

Figure S17. HMBC (acetone- $d_6$ ) spectrum of compound 2

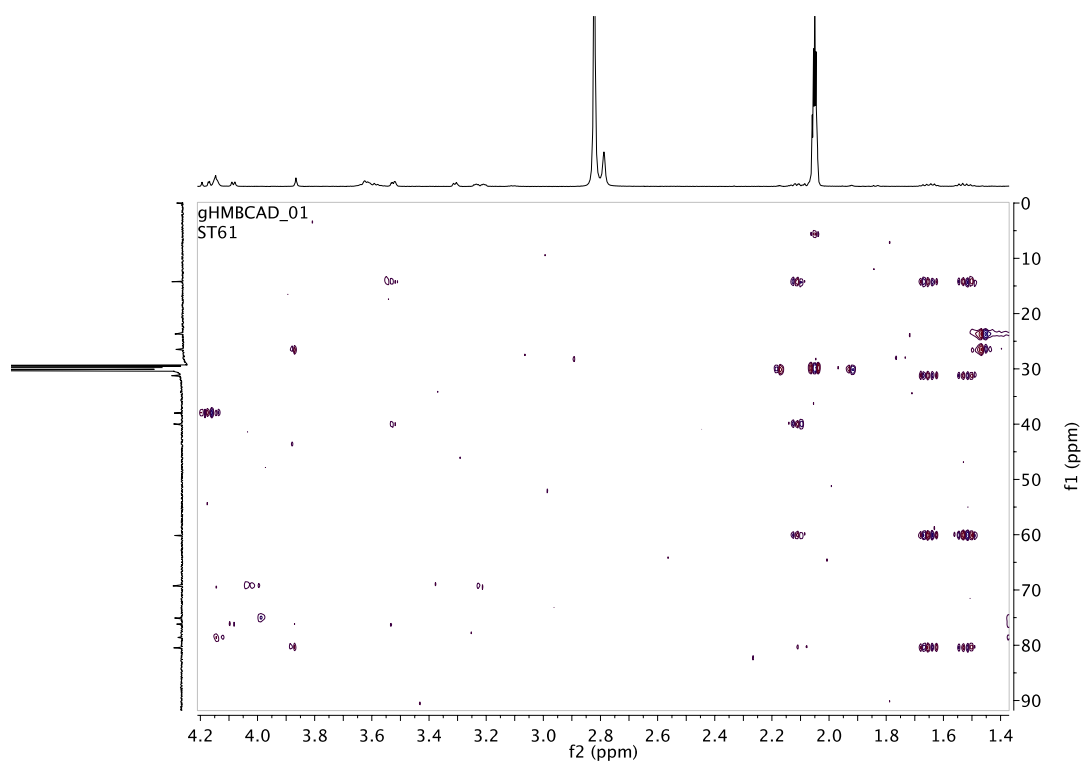

Figure S18. Partial HMBC (acetone- $d_6$ ) spectrum of compound 2

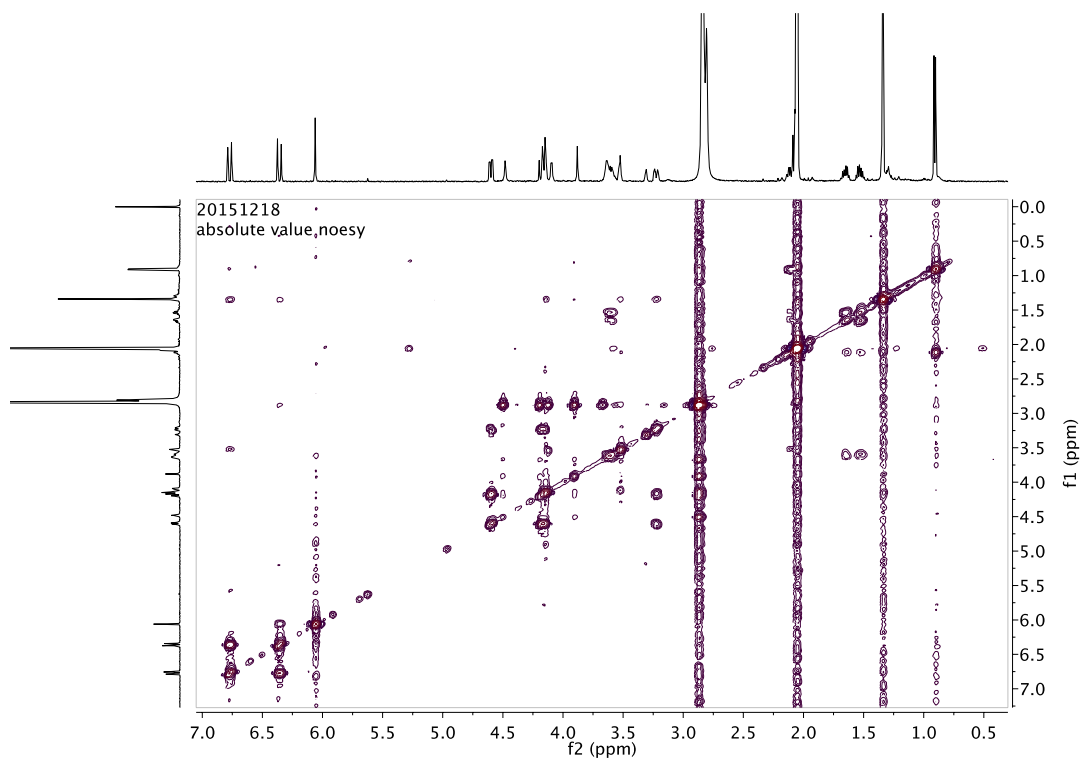

**Figure S19.** NOESY (acetone- $d_6$ ) spectrum of compound **2**

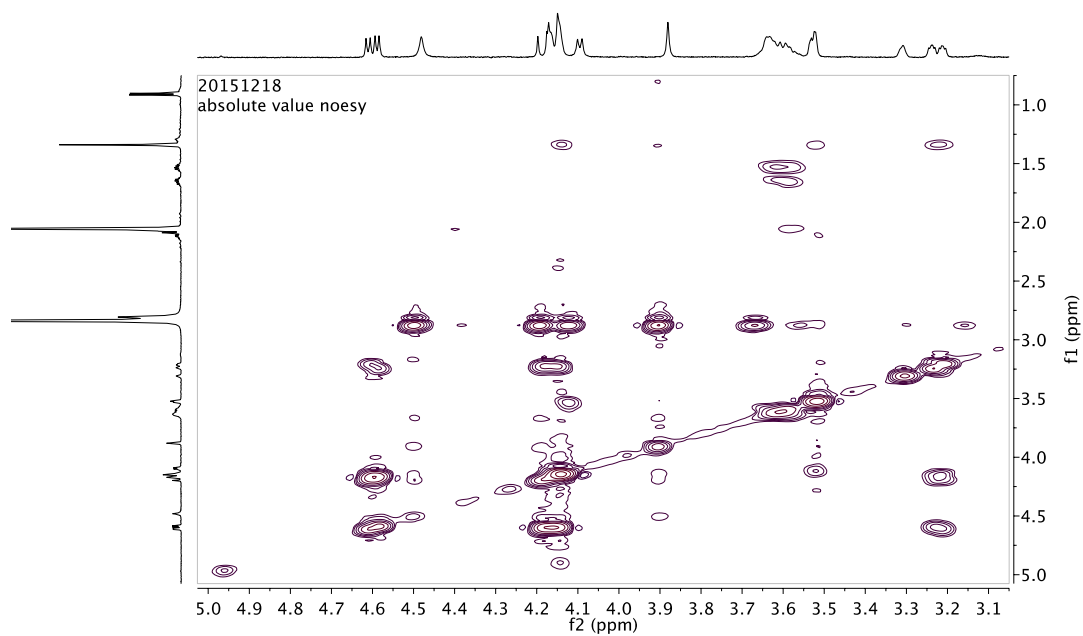

**Figure S20.** Partial NOESY (acetone- $d_6$ ) spectrum of compound **2**

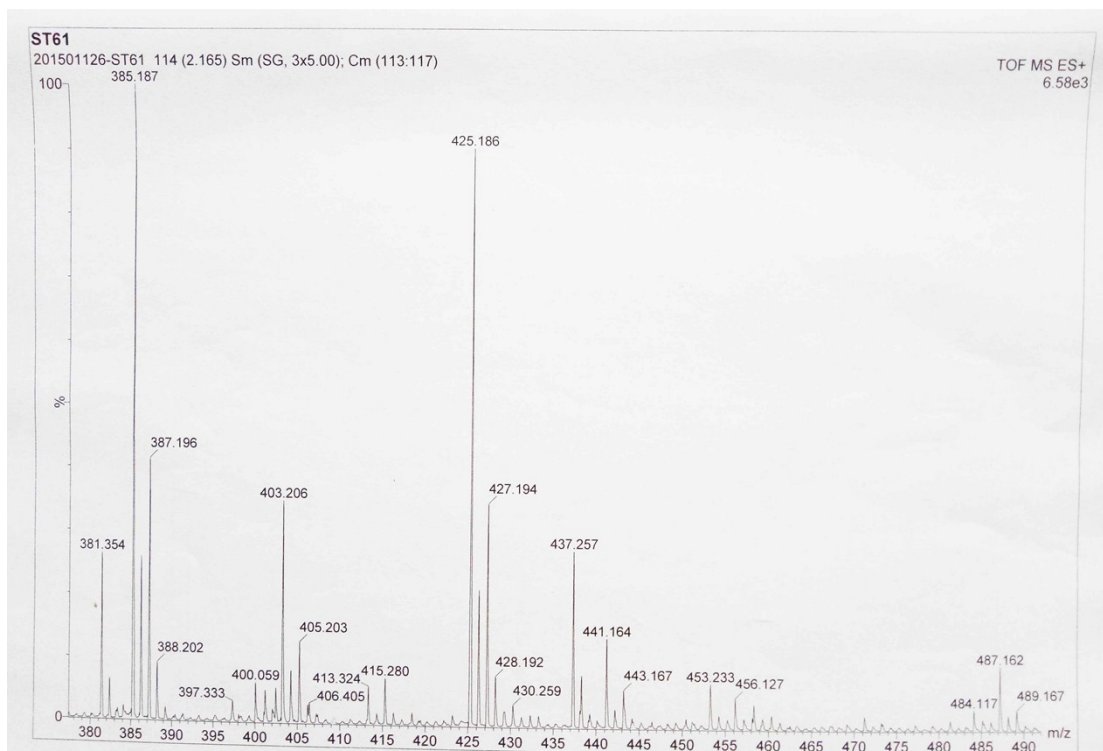

**Figure S21.** ESIMS spectrum of compound **2**

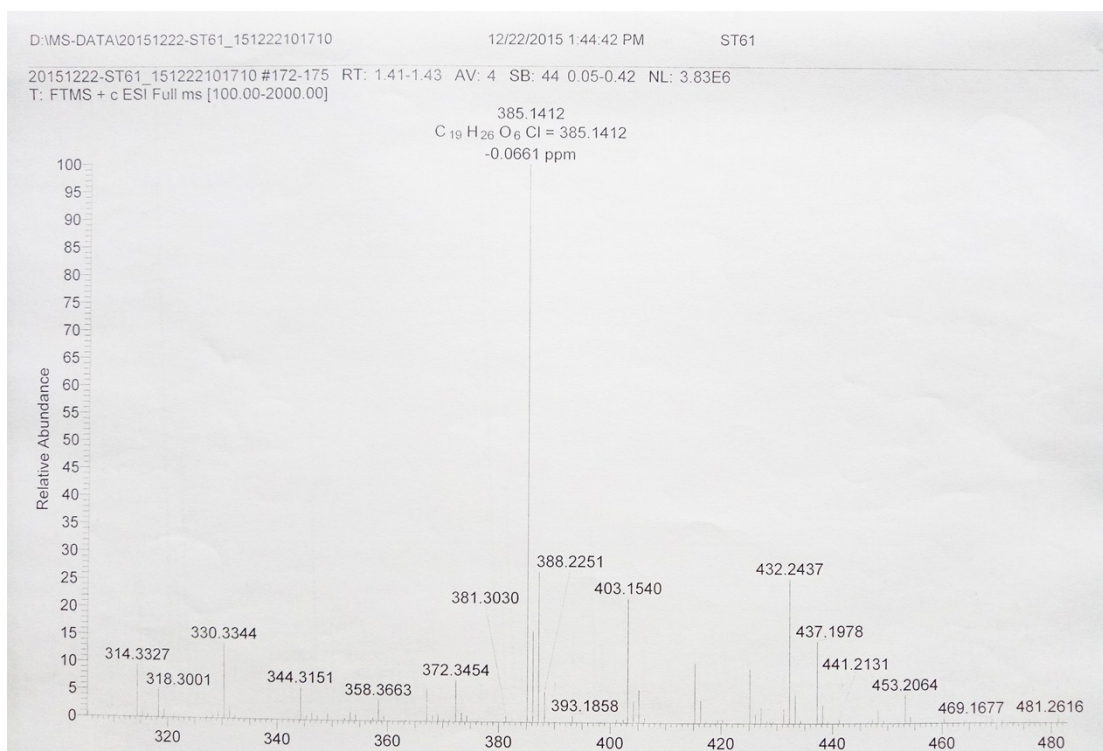

**Figure S22.** HRESIMS spectrum of compound **2**

**Table S1.**  $^1\text{H}$  NMR Data (500 MHz,  $\delta$  in ppm,  $J$  in Hz) and  $^{13}\text{C}$  NMR Data (125 MHz,  $\delta$  in ppm) for **5**

| position | $\delta_{\text{C}}^a$ , type | $\delta_{\text{H}}^a$ ( $J$ in Hz) |
|----------|------------------------------|------------------------------------|
| 1        | 68.4, CH <sub>2</sub>        | 4.21, m<br>4.46, dd (11.1, 4.8)    |
| 3        | 161.5, C                     |                                    |
| 4        | 102.7, CH                    | 6.06, s                            |
| 4a       | 145.3, C                     |                                    |
| 5        | 116.7, C                     |                                    |
| 6        | 193.4, C                     |                                    |
| 7        | 77.8, C                      |                                    |
| 8        | 73.9, CH                     | 4.07, d (2.3)                      |
| 8a       | 37.0, CH                     | 3.02, m                            |
| 9        | 23.4, CH <sub>3</sub>        | 1.34, s                            |
| 1'       | 122.5, CH                    | 6.25, d (15.5)                     |
| 2'       | 144.4, CH                    | 6.54, d (15.5)                     |
| 3'       | 75.9, C                      |                                    |
| 4'       | 78.4, CH                     | 3.45, m <sup>b</sup>               |
| 5'       | 35.5, CH                     | 1.65, m                            |
| 6'       | 28.8, CH <sub>2</sub>        | 1.38, m<br>1.30, m                 |
| 7'       | 11.9, CH <sub>3</sub>        | 0.88, t (7.4)                      |
| 8'       | 13.5, CH <sub>3</sub>        | 0.93, d (6.7)                      |
| 9'       | 23.5, CH <sub>3</sub>        | 1.29, s                            |

<sup>a</sup>In CDCl<sub>3</sub>. <sup>b</sup>Signal partially obscured

**Table S2.** Antibacterial activities of **3** against bacterial strains

| strain                  | MIC ( $\mu\text{M}$ ) |               |
|-------------------------|-----------------------|---------------|
|                         | <b>3</b>              | Ciprofloxacin |
| <i>M. lysodeikticus</i> | 6.75                  | 0.156         |
| <i>B. subtilis</i>      | 6.75                  | 0.156         |
| <i>B. cereus</i>        | 12.5                  | 0.078         |
| <i>M. luteus</i>        | 12.5                  | 0.313         |
| <i>B. megaterium</i>    | 12.5                  | 0.313         |
| <i>S. dysenteriae</i>   | 12.5                  | 0.156         |

## ECD calculation details of compound 1

### 1. Methods

Monte Carlo conformational searches were carried out by means of the Spartan's 10 software using Merck Molecular Force Field (MMFF). The conformers with Boltzmann-population of over 5% were chosen for ECD calculations, and then the conformers were initially optimized at B3LYP/6-31+g (d, p) level in MeOH using the CPCM polarizable conductor calculation model. The theoretical calculation of ECD was conducted in MeOH using Time-dependent Density functional theory (TD-DFT) at the B3LYP/6-311+g (d, p) level for all conformers of compounds **1**. Rotatory strengths for a total of 50 excited states were calculated. ECD spectra were generated using the program SpecDis 1.6 (University of Würzburg, Würzburg, Germany) and GraphPad Prism 5 (University of California San Diego, USA) from dipole-length rotational strengths by applying Gaussian band shapes with  $\sigma = 0.3$  eV.

### 2. Results

Table S1.2.1. Gibbs free energies<sup>a</sup> and equilibrium populations<sup>b</sup> of low-energy conformers of **1**.

| Conformer | In MeOH    |       |
|-----------|------------|-------|
|           | $\Delta G$ | P (%) |
| <b>1a</b> | 0          | 50.16 |
| <b>1b</b> | 0.01       | 49.09 |
| <b>1c</b> | 2.48       | 0.75  |
|           |            |       |
|           |            |       |

<sup>a</sup>B3LYP/6-31+G(d,p), in kcal/mol. <sup>b</sup>From  $\Delta G$  values at 298.15K.

Table S1.2.2. Cartesian coordinates for the low-energy reoptimized MMFF conformers of **1** at B3LYP/6-311+G(d,p) level of theory in CH<sub>3</sub>OH

| Conformer 1a |      | Standard Orientation<br>(Ångstroms) |           |           |           |
|--------------|------|-------------------------------------|-----------|-----------|-----------|
| I            | Atom | Type                                | X         | Y         | Z         |
| 1.           | 6.   | 0.                                  | -3.582630 | 0.471769  | -0.018510 |
| 2.           | 6.   | 0.                                  | -3.401356 | -0.512333 | 1.154532  |
| 3.           | 6.   | 0.                                  | -2.041455 | -0.281164 | 1.838996  |
| 4.           | 6.   | 0.                                  | -0.899754 | -0.368276 | 0.823577  |
| 5.           | 6.   | 0.                                  | -1.135359 | 0.448677  | -0.439251 |
| 6.           | 6.   | 0.                                  | -2.408115 | 0.788385  | -0.818344 |
| 7.           | 6.   | 0.                                  | 0.435395  | 0.048615  | 1.440104  |
| 8.           | 6.   | 0.                                  | 1.294686  | 0.421024  | -0.735925 |
| 9.           | 6.   | 0.                                  | 0.042491  | 0.756298  | -1.190547 |
| 10.          | 8.   | 0.                                  | -4.709500 | 0.922937  | -0.235793 |
| 11.          | 6.   | 0.                                  | -3.572813 | -1.953798 | 0.641965  |
| 12.          | 8.   | 0.                                  | -4.399845 | -0.228686 | 2.133669  |
| 13.          | 8.   | 0.                                  | -2.013853 | 1.006036  | 2.450940  |

|     |     |    |           |           |           |
|-----|-----|----|-----------|-----------|-----------|
| 14. | 1.  | 0. | -0.808424 | -1.420340 | 0.520507  |
| 15. | 6.  | 0. | 2.476440  | 0.584275  | -1.563785 |
| 16. | 6.  | 0. | 3.732207  | 0.280085  | -1.175336 |
| 17. | 1.  | 0. | -1.902059 | -1.058486 | 2.603595  |
| 18. | 6.  | 0. | 4.895266  | 0.465718  | -2.084626 |
| 19. | 8.  | 0. | 1.518191  | -0.089732 | 0.491520  |
| 20. | 6.  | 0. | 6.249950  | 0.110176  | -1.521855 |
| 21. | 8.  | 0. | 4.758910  | 0.889255  | -3.232620 |
| 22. | 17. | 0. | -2.703946 | 1.726249  | -2.275754 |
| 23. | 1.  | 0. | 0.407740  | 1.091952  | 1.768072  |
| 24. | 1.  | 0. | 0.703435  | -0.592116 | 2.280475  |
| 25. | 1.  | 0. | -0.040903 | 1.215143  | -2.167206 |
| 26. | 1.  | 0. | -4.583811 | -2.076380 | 0.244038  |
| 27. | 1.  | 0. | -3.438961 | -2.651936 | 1.473432  |
| 28. | 1.  | 0. | -2.861893 | -2.206120 | -0.149293 |
| 29. | 1.  | 0. | -5.137584 | 0.196077  | 1.659133  |
| 30. | 1.  | 0. | -2.855788 | 1.099662  | 2.925740  |
| 31. | 1.  | 0. | 2.309824  | 0.972388  | -2.564684 |
| 32. | 1.  | 0. | 3.924728  | -0.108093 | -0.179999 |
| 33. | 1.  | 0. | 7.028359  | 0.270719  | -2.268715 |
| 34. | 1.  | 0. | 6.258078  | -0.936427 | -1.195116 |
| 35. | 1.  | 0. | 6.457347  | 0.719448  | -0.633940 |

| <b>Conformer 1b</b> |      | Standard Orientation<br>(Ångstroms) |           |           |           |
|---------------------|------|-------------------------------------|-----------|-----------|-----------|
| I                   | Atom | Type                                | X         | Y         | Z         |
| 1.                  | 6.   | 0.                                  | -3.445264 | 0.181820  | 0.052531  |
| 2.                  | 6.   | 0.                                  | -3.237343 | -0.492623 | 1.423525  |
| 3.                  | 6.   | 0.                                  | -1.913269 | -0.023037 | 2.054147  |
| 4.                  | 6.   | 0.                                  | -0.740750 | -0.265052 | 1.100626  |
| 5.                  | 6.   | 0.                                  | -0.990354 | 0.226235  | -0.318584 |
| 6.                  | 6.   | 0.                                  | -2.270156 | 0.385682  | -0.782396 |
| 7.                  | 6.   | 0.                                  | 0.549100  | 0.367048  | 1.623315  |
| 8.                  | 6.   | 0.                                  | 1.443618  | 0.292800  | -0.568449 |
| 9.                  | 6.   | 0.                                  | 0.187027  | 0.432612  | -1.104503 |
| 10.                 | 8.   | 0.                                  | -4.591191 | 0.494200  | -0.278658 |
| 11.                 | 6.   | 0.                                  | -3.308253 | -2.021289 | 1.255615  |
| 12.                 | 8.   | 0.                                  | -4.277676 | -0.056614 | 2.297618  |
| 13.                 | 8.   | 0.                                  | -1.980156 | 1.368943  | 2.354248  |
| 14.                 | 1.   | 0.                                  | -0.578116 | -1.350268 | 1.047646  |
| 15.                 | 6.   | 0.                                  | 2.637367  | 0.343277  | -1.397638 |
| 16.                 | 6.   | 0.                                  | 3.895596  | 0.218912  | -0.922834 |
| 17.                 | 1.   | 0.                                  | -1.748073 | -0.594357 | 2.978506  |



|     |     |    |           |           |           |
|-----|-----|----|-----------|-----------|-----------|
| 18. | 6.  | 0. | 5.115353  | 0.258114  | -1.760343 |
| 19. | 8.  | 0. | 1.664336  | 0.089384  | 0.744918  |
| 20. | 6.  | 0. | 5.005309  | 0.448203  | -3.257105 |
| 21. | 8.  | 0. | 6.214478  | 0.134054  | -1.214608 |
| 22. | 17. | 0. | -2.581855 | 0.945652  | -2.419491 |
| 23. | 1.  | 0. | 0.449066  | 1.453372  | 1.704837  |
| 24. | 1.  | 0. | 0.832976  | -0.048188 | 2.590495  |
| 25. | 1.  | 0. | 0.102484  | 0.651072  | -2.161153 |
| 26. | 1.  | 0. | -4.299003 | -2.296756 | 0.884132  |
| 27. | 1.  | 0. | -3.155418 | -2.499637 | 2.227448  |
| 28. | 1.  | 0. | -2.562518 | -2.402580 | 0.552989  |
| 29. | 1.  | 0. | -5.026670 | 0.197985  | 1.728443  |
| 30. | 1.  | 0. | -2.840100 | 1.514190  | 2.781373  |
| 31. | 1.  | 0. | 2.451973  | 0.482985  | -2.457948 |
| 32. | 1.  | 0. | 4.072358  | 0.078705  | 0.139439  |
| 33. | 1.  | 0. | 4.431095  | -0.367152 | -3.710243 |
| 34. | 1.  | 0. | 6.005405  | 0.468036  | -3.691521 |
| 35. | 1.  | 0. | 4.488625  | 1.384272  | -3.494372 |

| Conformer 1c |      | Standard Orientation<br>(Ångstroms) |           |           |           |
|--------------|------|-------------------------------------|-----------|-----------|-----------|
| I            | Atom | Type                                | X         | Y         | Z         |
| 1.           | 6.   | 0.                                  | -3.368505 | 0.169148  | 0.225428  |
| 2.           | 6.   | 0.                                  | -3.137804 | -0.512087 | 1.589676  |
| 3.           | 6.   | 0.                                  | -1.807680 | -0.040777 | 2.205732  |
| 4.           | 6.   | 0.                                  | -0.647963 | -0.266542 | 1.233055  |
| 5.           | 6.   | 0.                                  | -0.919000 | 0.233032  | -0.178786 |
| 6.           | 6.   | 0.                                  | -2.208254 | 0.388131  | -0.621880 |
| 7.           | 6.   | 0.                                  | 0.643472  | 0.373678  | 1.739371  |
| 8.           | 6.   | 0.                                  | 1.507597  | 0.297622  | -0.470959 |
| 9.           | 6.   | 0.                                  | 0.242913  | 0.449911  | -0.981855 |
| 10.          | 8.   | 0.                                  | -4.523173 | 0.472377  | -0.087265 |
| 11.          | 6.   | 0.                                  | -3.201968 | -2.040030 | 1.413587  |
| 12.          | 8.   | 0.                                  | -4.168994 | -0.087568 | 2.480205  |
| 13.          | 8.   | 0.                                  | -1.877710 | 1.347784  | 2.520998  |
| 14.          | 1.   | 0.                                  | -0.477949 | -1.349991 | 1.170526  |
| 15.          | 6.   | 0.                                  | 2.748252  | 0.325224  | -1.242864 |
| 16.          | 6.   | 0.                                  | 2.839649  | 0.296486  | -2.588252 |
| 17.          | 1.   | 0.                                  | -1.625841 | -0.620422 | 3.121931  |
| 18.          | 6.   | 0.                                  | 4.115377  | 0.343666  | -3.341359 |
| 19.          | 8.   | 0.                                  | 1.747150  | 0.106966  | 0.844240  |
| 20.          | 6.   | 0.                                  | 5.434458  | 0.417363  | -2.605953 |
| 21.          | 8.   | 0.                                  | 4.073059  | 0.322688  | -4.573160 |

|     |     |    |           |           |           |
|-----|-----|----|-----------|-----------|-----------|
| 22. | 17. | 0. | -2.546005 | 0.960730  | -2.251050 |
| 23. | 1.  | 0. | 0.537018  | 1.459553  | 1.821979  |
| 24. | 1.  | 0. | 0.945419  | -0.039536 | 2.702018  |
| 25. | 1.  | 0. | 0.129606  | 0.687848  | -2.030525 |
| 26. | 1.  | 0. | -4.194639 | -2.319533 | 1.050305  |
| 27. | 1.  | 0. | -3.036076 | -2.523468 | 2.380771  |
| 28. | 1.  | 0. | -2.460661 | -2.412210 | 0.701264  |
| 29. | 1.  | 0. | -4.924969 | 0.169556  | 1.921164  |
| 30. | 1.  | 0. | -2.732534 | 1.483749  | 2.961285  |
| 31. | 1.  | 0. | 3.646111  | 0.359545  | -0.632024 |
| 32. | 1.  | 0. | 1.956318  | 0.233100  | -3.217812 |
| 33. | 1.  | 0. | 5.490086  | 1.329432  | -2.002014 |
| 34. | 1.  | 0. | 6.249163  | 0.416232  | -3.330862 |
| 35. | 1.  | 0. | 5.552074  | -0.433656 | -1.926916 |
